# Supplementary material
Source: PubMed Central journal article supplement (PMC3193193)
Supplement: 1107913108_pnas.201107913SI.pdf [file 1107913108_pnas.201107913SI.pdf]

# Supporting Information

Scapini et al. 10.1073/pnas.1107913108

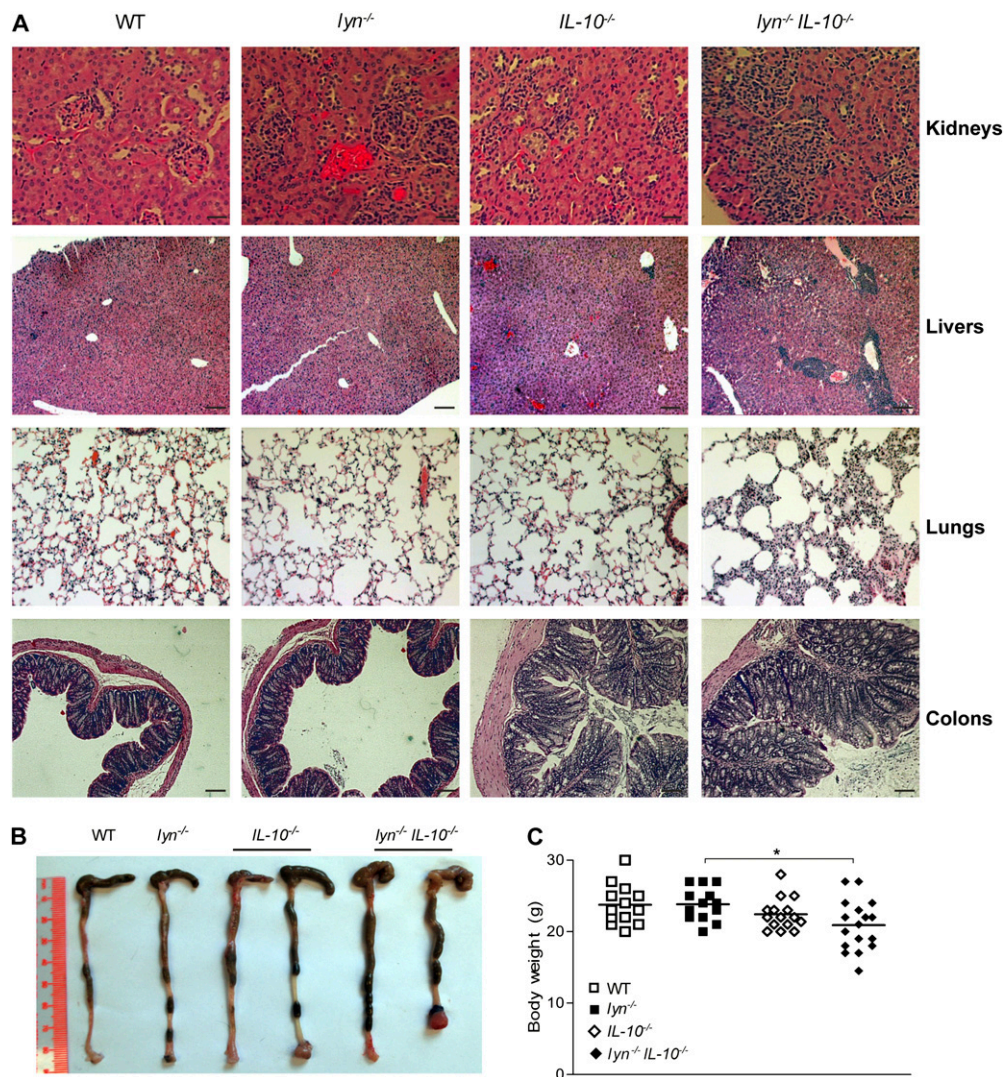

**Fig. S1.** IL-10 deficiency exacerbates tissue inflammation in *lyn*<sup>-/-</sup> mice. (A) Representative H&E staining of kidneys (magnification:  $\times 200$ ; top row), livers (magnification:  $\times 100$ ; second row), lungs (magnification:  $\times 100$ ; third row), and colons (magnification:  $\times 100$ ; bottom row) sections from 5- to 6-mo-old WT, *lyn*<sup>-/-</sup>, *IL-10*<sup>-/-</sup>, or *lyn*<sup>-/-</sup>*IL-10*<sup>-/-</sup> mice. (Scale bars: A, 200  $\mu$ m.) Data are representative of 10 to 12 mice for each genotype analyzed at end-point experiments. (B) Representative images of colons from 5- to 6-mo-old WT, *lyn*<sup>-/-</sup>, *IL-10*<sup>-/-</sup>, or *lyn*<sup>-/-</sup>*IL-10*<sup>-/-</sup> mice. Data are representative of 10 to 12 mice for each genotype analyzed at end-point experiments. (C) Each symbol represents the body weight of an individual 5- to 6-mo-old WT, *lyn*<sup>-/-</sup>, *IL-10*<sup>-/-</sup>, or *lyn*<sup>-/-</sup>*IL-10*<sup>-/-</sup> mouse. Data are pooled from three independent end-point experiments. Statistical differences of *lyn*<sup>-/-</sup>*IL-10*<sup>-/-</sup> double-mutant vs. *lyn*<sup>-/-</sup> or *IL-10*<sup>-/-</sup> single-mutant mice are reported (\* $P < 0.05$ ).





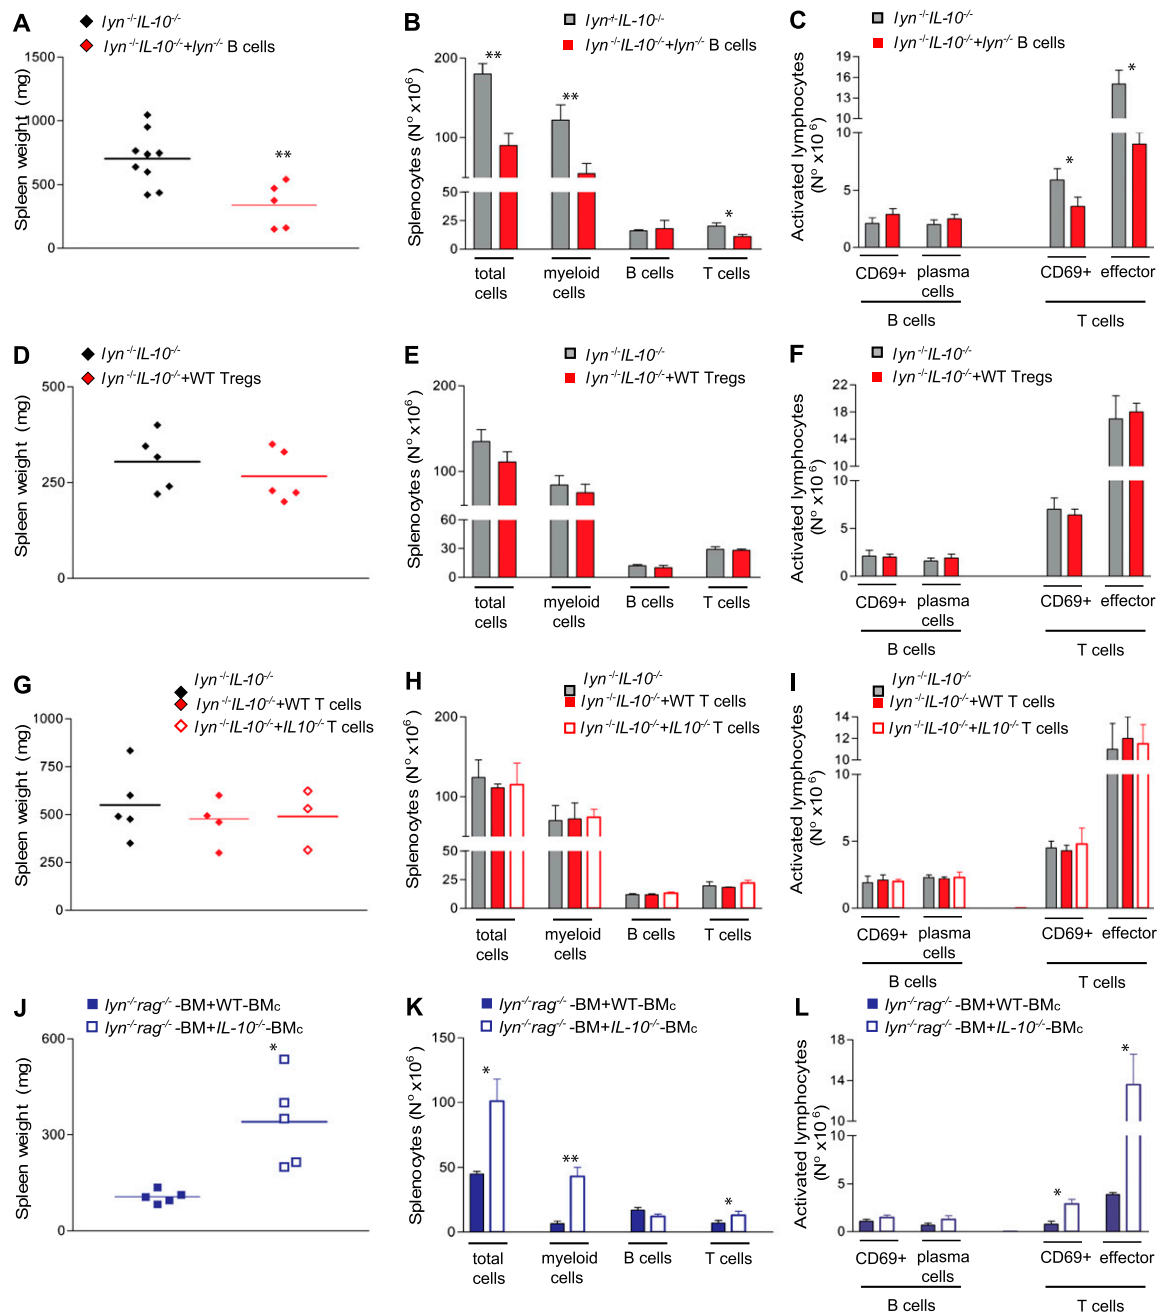

**Fig. 54.** IL-10 production by  $lyn^{-/-}$  B cells is sufficient to reduce the disease development in  $lyn^{-/-}IL-10^{-/-}$  mice, whereas IL-10 production by CD4<sup>+</sup> Tregs, total T cells, or myeloid cells is not sufficient to reduce disease. (A–I) Two-month-old  $lyn^{-/-}IL-10^{-/-}$  chimeras were injected with  $5 \times 10^6$  CD19<sup>+</sup>  $lyn^{-/-}$  B cells (isolated from spleen and lymph nodes of 2-mo-old  $lyn^{-/-}$  animals; A–C),  $10 \times 10^6$  WT CD4<sup>+</sup> Tregs (isolated and expanded in vitro; D–F), or WT or  $IL-10^{-/-}$  T cells ( $10 \times 10^6$  TCR $\beta^+$  T cells, isolated from spleen and lymph nodes of 2-mo-old WT or  $IL-10^{-/-}$  animals; G–I). Two to 3 mo after the adoptive transfer, recipient  $lyn^{-/-}IL-10^{-/-}$  mice were killed and analyzed for signs of disease development. (J–L) Chimeric mice were generated by reconstituting the hematopoietic system of lethally irradiated WT or  $IL-10^{-/-}$  animals with bone marrow from  $lyn^{-/-}rag^{-/-}$  mice mixed, in a ratio of 75% to 25%, with WT or  $IL-10^{-/-}$  bone marrow. Four months after reconstitution, the mixed chimeras were killed and analyzed for signs of disease development. Each symbol represents the weight of an individual mouse spleen. The absolute number of total, myeloid (CD11b<sup>+</sup>), total B (CD19<sup>+</sup> plus CD19/B220<sup>low/</sup>-CD138<sup>+</sup> cells), and T (TCR $\beta^+$ ) cells is reported. T effectors are defined as TCR $\beta^+$ CD44<sup>high</sup>CD62L<sup>-</sup>, whereas plasma cells/plasmablasts were CD19/B220<sup>low/</sup>-CD138<sup>+</sup>. Data were pooled from two independent end-point experiments and are presented  $\pm$  SEM ( $n = 5$ –9 mice per group; \* $P < 0.05$ ; \*\* $P < 0.01$ ).
